# Supplementary material
Source: Springer Nature journal article supplement (https://www.springermedizin.de/resource/supplementary/13058_2012_3263_MOESM6_ESM.pdf/9703684)

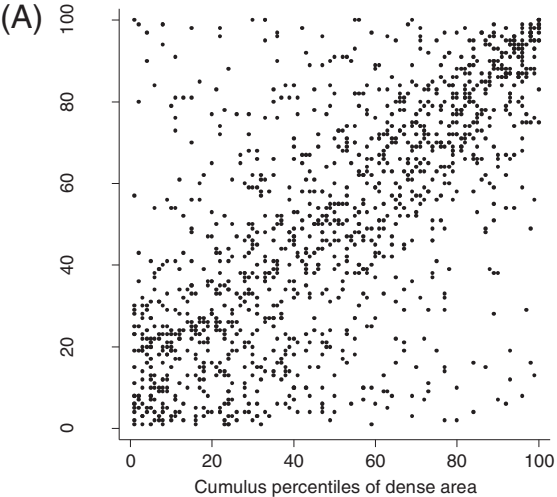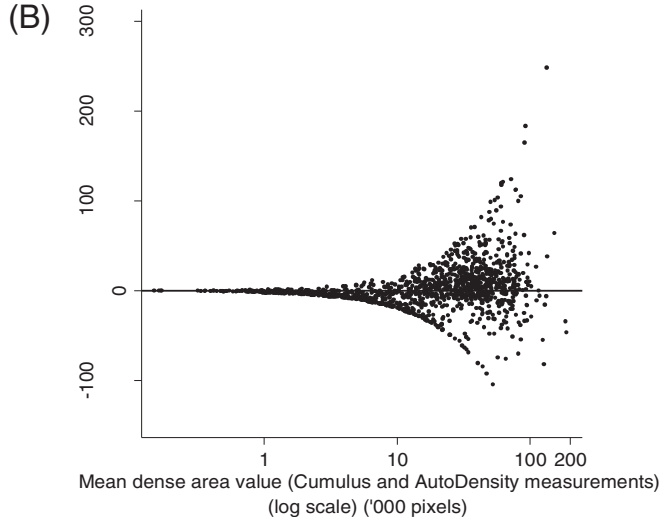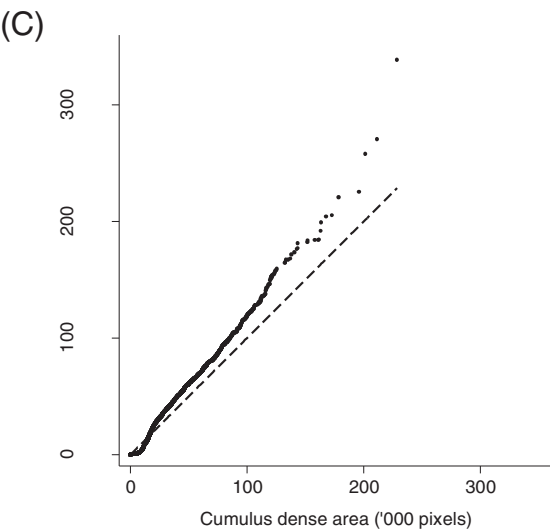

(D)

|                           |     | <i>AutoDensity categories</i> |            |            |            |            |            |
|---------------------------|-----|-------------------------------|------------|------------|------------|------------|------------|
|                           |     | Q1                            | Q2         | Q3         | Q4         | D9         | D10        |
| <i>Cumulus categories</i> | Q1  | <b>8.2</b>                    | 6.9        | 1.4        | 0.7        | 0.4        | 0.7        |
|                           | Q2  | 5.4                           | <b>7.6</b> | 3.9        | 1.6        | 0.4        | 0.7        |
|                           | Q3  | 2.6                           | 3.9        | <b>8.0</b> | 3.8        | 0.9        | 0.9        |
|                           | Q4  | 1.5                           | 1.4        | 5.4        | <b>8.5</b> | 2.8        | 1.4        |
|                           | D9  | 0.4                           | 0.3        | 0.9        | 3.9        | <b>3.1</b> | 1.9        |
|                           | D10 | 0.3                           | 0.2        | 0.4        | 1.7        | 2.4        | <b>5.6</b> |

Supplement: MOESM6 [file 9703684]
